# Supplementary material for: Association of Low Lead Levels with Behavioral Problems and Executive Function Deficits in Schoolers from Montevideo, Uruguay
Source: MDPI journal article supplement (doi:10.3390/ijerph15122735), 2018-12-04
Supplement: s1 [file s1]

## Online Supplemental Materials

**Supplemental Table 1. Patterns of missing values in study variables.**

|                                                                         | Age | GIA score | Mat. education | HOME score | BMI | Mat. occupation | Blood lead level | Possessions | Crowding | Parent smoking | Serum ferritin | CTRS-R:S <sup>1</sup> | BRIEF <sup>2</sup> |
|-------------------------------------------------------------------------|-----|-----------|----------------|------------|-----|-----------------|------------------|-------------|----------|----------------|----------------|-----------------------|--------------------|
| Missing Values                                                          | 2   | 14        | 19             | 21         | 27  | 28              | 38               | 44          | 47       | 47             | 49             | 65                    | 68                 |
| Percent of sample with specific patterns of missing values <sup>3</sup> |     |           |                |            |     |                 |                  |             |          |                |                |                       |                    |
| 58%                                                                     | 1   | 1         | 1              | 1          | 1   | 1               | 1                | 1           | 1        | 1              | 1              | 1                     | 1                  |
| 10%                                                                     | 1   | 1         | 1              | 1          | 1   | 1               | 1                | 1           | 1        | 1              | 1              | 0                     | 0                  |
| 4%                                                                      | 1   | 1         | 1              | 1          | 1   | 1               | 1                | 0           | 0        | 0              | 1              | 1                     | 1                  |
| 3%                                                                      | 1   | 1         | 1              | 1          | 1   | 1               | 1                | 1           | 1        | 1              | 0              | 1                     | 1                  |
| 2%                                                                      | 1   | 1         | 1              | 1          | 0   | 1               | 0                | 1           | 1        | 1              | 0              | 1                     | 1                  |
| 1%                                                                      | 1   | 1         | 0              | 0          | 0   | 0               | 0                | 0           | 0        | 0              | 0              | 1                     | 1                  |
| 1%                                                                      | 1   | 1         | 1              | 1          | 1   | 0               | 1                | 0           | 0        | 0              | 1              | 1                     | 1                  |
| 1%                                                                      | 1   | 1         | 1              | 1          | 1   | 1               | 1                | 1           | 1        | 1              | 1              | 1                     | 0                  |
| 1%                                                                      | 1   | 1         | 1              | 0          | 1   | 1               | 1                | 1           | 1        | 1              | 1              | 1                     | 1                  |
| 1%                                                                      | 1   | 1         | 1              | 1          | 1   | 0               | 1                | 1           | 1        | 1              | 1              | 1                     | 1                  |
| 1%                                                                      | 1   | 1         | 1              | 1          | 1   | 1               | 0                | 1           | 1        | 1              | 0              | 1                     | 1                  |
| 1%                                                                      | 1   | 1         | 1              | 1          | 1   | 1               | 1                | 0           | 0        | 0              | 1              | 0                     | 0                  |
| 1%                                                                      | 1   | 1         | 1              | 1          | 1   | 1               | 1                | 1           | 1        | 1              | 0              | 0                     | 0                  |
| All other patterns of missing values, <1% of sample                     |     |           |                |            |     |                 |                  |             |          |                |                |                       |                    |

<sup>1</sup>CTRS-R:S = Conners Behavior Rating Scales for Teachers—Revised Short Form; <sup>2</sup>BRIEF=Behavior Rating Inventory of Executive Function for teachers; <sup>3</sup>Values given as 1 = complete observations; 0 = missing observations.

**Supplemental Table 2. Percent of children with behavioral problems (T score  $\geq 65$  or  $\geq 70$ ) stratified by gender**

|  | Girls(%) | Boys(%) |
|--|----------|---------|
|--|----------|---------|

|                              |      |      |
|------------------------------|------|------|
| CTRS-R:S <sup>a</sup>        |      |      |
| Oppositional                 |      |      |
| T score ≥ 65                 | 13.1 | 19.6 |
| T score ≥ 70                 | 13.1 | 14.6 |
| Hyperactivity                |      |      |
| T score ≥ 65                 | 20.0 | 22.1 |
| T score ≥ 70                 | 13.8 | 12.6 |
| Cognitive probl./Inattention |      |      |
| T score ≥ 65                 | 22.3 | 20.9 |
| T score ≥ 70                 | 19.2 | 13.9 |
| ADHD Index                   |      |      |
| T score ≥ 65                 | 23.1 | 20.8 |
| T score ≥ 70                 | 17.7 | 8.8  |
| BRIEF <sup>b</sup>           |      |      |
| Inhibition                   |      |      |
| T score ≥ 65                 | 19.0 | 15.7 |
| T score ≥ 70                 | 16.7 | 8.1  |
| Shift                        |      |      |
| T score ≥ 65                 | 18.2 | 16.9 |
| T score ≥ 70                 | 13.5 | 11.2 |
| Emotional Control            |      |      |
| T score ≥ 65                 | 21.4 | 23.2 |
| T score ≥ 70                 | 17.5 | 15.1 |
| Initiate                     |      |      |
| T score ≥ 65                 | 38.1 | 29.5 |
| T score ≥ 70                 | 30.9 | 22.0 |
| Organization of Materials    |      |      |
| T score ≥ 65                 | 15.0 | 21.4 |
| T score ≥ 70                 | 7.1  | 13.2 |
| Working Memory               |      |      |
| T score ≥ 65                 | 31.7 | 35.8 |
| T score ≥ 70                 | 24.6 | 26.4 |
| Plan/Organize                |      |      |
| T score ≥ 65                 | 31.5 | 33.9 |
| T score ≥ 70                 | 23.0 | 28.3 |
| Monitor                      |      |      |

|                             |      |      |
|-----------------------------|------|------|
| T score $\geq 65$           | 29.3 | 24.5 |
| T score $\geq 70$           | 17.4 | 15.1 |
| Behavioral Regulation Index |      |      |
| T score $\geq 65$           | 18.2 | 18.2 |
| T score $\geq 70$           | 15.1 | 10.1 |
| Metacognition Index         |      |      |
| T score $\geq 65$           | 31.7 | 33.9 |
| T score $\geq 70$           | 23.8 | 25.7 |
| Global Executive Composite  |      |      |
| T score $\geq 65$           | 27.8 | 27.0 |
| T score $\geq 70$           | 22.2 | 17.6 |

---

<sup>a</sup>Conners Teacher Rating Scales- Revised Short Form (sub-scales T score). <sup>b</sup>Behavior Rating Inventory of Executive Function for teachers (sub-scales T score).

**Supplemental Table 3. Association (prevalence ratio) between blood lead concentrations and behavior ratings by teachers among 5-8-year-old children from Montevideo, Uruguay using an imputed dataset (n=353).**

| Behavior rating scale (T score) | Unadjusted         | Covariate-adjusted <sup>1</sup> |
|---------------------------------|--------------------|---------------------------------|
|                                 | PR [95% CI]        | PR [95% CI]                     |
| CTRS-R:S <sup>2</sup>           |                    |                                 |
| Oppositional                    | 1.00 [0.99, 1.02]  | 1.00 [0.99, 1.01]               |
| Cognitive Problems/Inattention  | 1.01 [0.99, 1.02]  | 1.00 [0.99, 1.01]               |
| Hyperactivity                   | 1.01 [1.00, 1.02]  | 1.01 [1.00, 1.02]               |
| ADHD Index                      | 1.01 [0.99, 1.02]  | 1.01 [1.00, 1.02]               |
| BRIEF <sup>3</sup>              |                    |                                 |
| Inhibit                         | 1.01 [1.00, 1.02]* | 1.01 [1.00, 1.02]               |
| Shift                           | 1.00 [0.99, 1.02]  | 1.00 [0.99, 1.01]               |
| Emotional Control               | 1.01 [1.00, 1.02]  | 1.01 [1.00, 1.02]               |
| Initiate                        | 1.01 [0.99, 1.02]  | 1.01 [0.99, 1.02]               |
| Organization of Materials       | 1.00 [1.00, 1.01]  | 1.00 [1.00, 1.01]               |
| Working Memory                  | 1.00 [0.99, 1.02]  | 1.01 [0.99, 1.01]               |
| Plan/Organize                   | 1.01 [0.99, 1.02]  | 1.01 [0.99, 1.01]               |
| Monitor                         | 1.01 [1.00, 1.02]  | 1.01 [1.00, 1.02]               |
| Behavioral Regulation Index     | 1.01 [1.00, 1.03]* | 1.01 [1.00, 1.02]               |
| Metacognition Index             | 1.01 [0.99, 1.02]  | 1.00 [0.99, 1.02]               |
| Global Executive Composite      | 1.01 [1.00, 1.02]  | 1.01 [1.00, 1.02]               |

<sup>1</sup>Models adjusted for child IQ, iron status, body mass index, blood lead testing method, household possessions, maternal education, and current parent smoking (yes/no). <sup>2</sup>CTRS-R:S = Conners Behavior Rating Scales for Teachers—Revised Short Form. <sup>3</sup>BRIEF = Behavior Rating Inventory of Executive Function for teachers. PR = Prevalence Ratio. \* $p < 0.05$ .

**Supplemental Table 4. Association (prevalence ratio) between blood lead among 5-8-year-old children with blood lead concentrations <5 and ≥ 5 µg/dL using an imputed dataset (n=353).**

| Behavior rating scale (T score) | Unadjusted         | Covariate-adjusted <sup>1</sup> |
|---------------------------------|--------------------|---------------------------------|
|                                 | PR [95% CI]        | PR [95% CI]                     |
| CTRS-R:S <sup>2</sup>           |                    |                                 |
| Oppositional                    | 1.02 [0.95, 1.08]  | 1.00 [0.94, 1.06]               |
| Cognitive Problems/Inattention  | 1.03 [0.97, 1.10]  | 1.02 [0.98, 1.07]               |
| Hyperactivity                   | 1.04 [0.99, 1.10]  | 1.04 [0.98, 1.09]               |
| ADHD Index                      | 1.03 [0.98, 1.09]  | 1.03 [0.98, 1.08]               |
| BRIEF <sup>3</sup>              |                    |                                 |
| Inhibit                         | 1.04 [0.98, 1.09]  | 1.04 [0.98, 1.09]               |
| Shift                           | 1.04 [0.99, 1.10]  | 1.03 [0.98, 1.08]               |
| Emotional Control               | 1.06 [0.99, 1.13]  | 1.05 [0.98, 1.12]               |
| Initiate                        | 1.04 [0.97, 1.11]  | 1.03 [0.97, 1.09]               |
| Organization of Materials       | 1.01 [0.96, 1.07]  | 1.01 [0.95, 1.06]               |
| Working Memory                  | 1.03 [0.97, 1.11]  | 1.02 [0.97, 1.08]               |
| Plan/Organize                   | 1.02 [0.96, 1.09]  | 1.01 [0.95, 1.08]               |
| Monitor                         | 1.04 [0.98, 1.11]  | 1.03 [0.98, 1.09]               |
| Behavioral Regulation Index     | 1.07 [1.00, 1.13]* | 1.05 [0.99, 1.11]               |
| Metacognition Index             | 1.03 [0.97, 1.10]  | 1.02 [0.97, 1.08]               |
| Global Executive Composite      | 1.05 [0.99, 1.12]  | 1.04 [0.98, 1.10]               |

<sup>1</sup>Models adjusted for child IQ, iron status, body mass index, blood lead testing method, household possessions, maternal education, and current parent smoking (yes/no). <sup>2</sup>CTRS-R:S = Conners Behavior Rating Scales for Teachers—Revised Short Form. <sup>3</sup>BRIEF = Behavior Rating Inventory of Executive Function for teachers. PR = Prevalence Ratio. \**p* < 0.05.

**Supplemental Table 5. Covariate-adjusted (prevalence ratio) association between blood lead concentrations and teacher ratings of behavior among 5-8-year-old girls and boys from Montevideo, Uruguay using an imputed dataset (n=353).**

| Behavior rating scale (T score) | Girls (n=158)            | Boys (n=195)             |
|---------------------------------|--------------------------|--------------------------|
|                                 | PR [95% CI] <sup>1</sup> | PR [95% CI] <sup>1</sup> |
| CTRS-R:S <sup>2</sup>           |                          |                          |
| Oppositional                    | 1.01 [0.99, 1.03]        | 1.00 [0.97, 1.02]        |
| Cognitive Problems/Inattention  | 1.01 [1.00, 1.03]        | 1.00 [0.99, 1.02]        |
| Hyperactivity                   | 1.02 [1.00, 1.04]*       | 1.00 [0.99, 1.02]        |
| ADHD Index                      | 1.01 [0.99, 1.03]        | 1.00 [0.99, 1.02]        |
| BRIEF <sup>3</sup>              |                          |                          |
| Inhibit                         | 1.02 [1.00, 1.04]*       | 1.00 [0.98, 1.01]        |
| Shift                           | 1.01 [1.00, 1.03]        | 1.00 [0.98, 1.01]        |
| Emotional Control               | 1.02 [1.00, 1.05]*       | 1.00 [0.97, 1.01]        |
| Initiate                        | 1.01 [0.99, 1.03]        | 1.00 [0.99, 1.02]        |
| Organization of Materials       | 1.00 [0.99, 1.02]        | 1.00 [0.98, 1.01]        |
| Working Memory                  | 1.00 [0.98, 1.02]        | 1.00 [0.99, 1.02]        |
| Plan/Organize                   | 1.00 [0.98, 1.02]        | 1.00 [0.98, 1.02]        |
| Monitor                         | 1.01 [0.99, 1.03]        | 1.00 [0.99, 1.02]        |
| Behavioral Regulation Index     | 1.02 [1.01, 1.05]*       | 1.00 [0.98, 1.01]        |
| Metacognition Index             | 1.01 [0.99, 1.02]        | 1.00 [0.97, 1.02]        |
| Global Executive Composite      | 1.01 [1.00, 1.03]        | 1.00 [0.98, 1.01]        |

<sup>1</sup>Models adjusted for child IQ, iron status, body mass index, blood lead testing method, household possessions, maternal education, and current parent smoking (yes/no). <sup>2</sup>CTRS-R:S = Conners Behavior Rating Scales for Teachers—Revised Short Form. <sup>3</sup>BRIEF = Behavior Rating Inventory of Executive Function for teachers. PR = Prevalence Ratio. \* $p < 0.05$ .
